# Supplementary material
Source: PubMed Central journal article supplement (PMC2896892)
Supplement: NIHMS212965-supplement-Fig_S1.pdf [file NIHMS212965-supplement-Fig_S1.pdf]

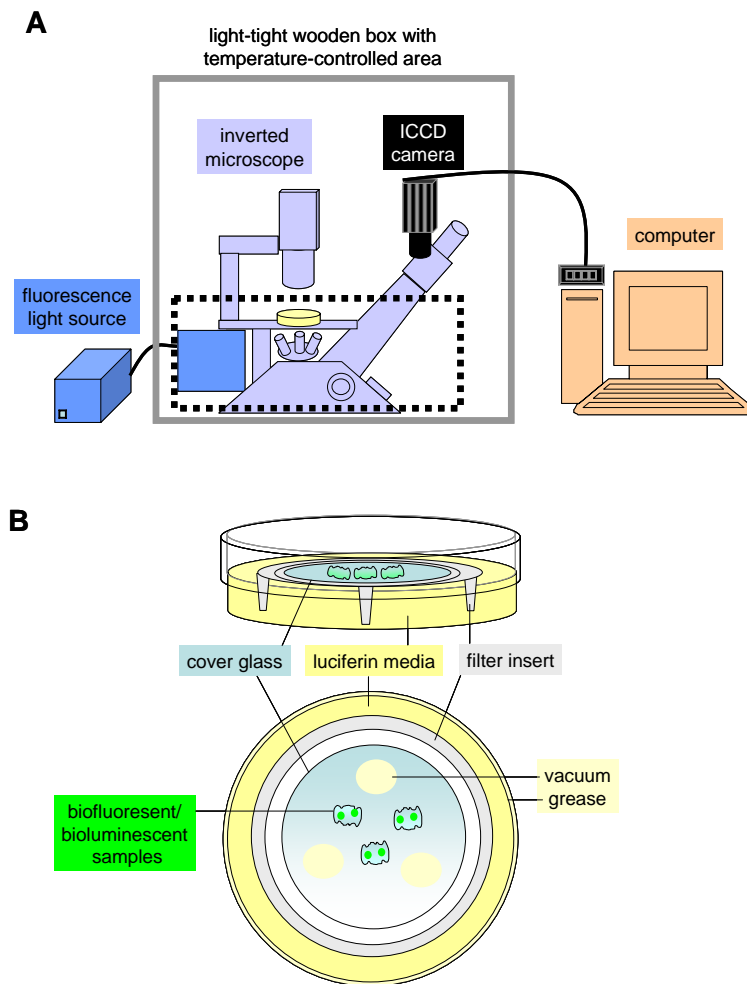

**Supplemental Figure S1: Fluorescence/luminescence Imaging System and**

**Sample Preparation.** The fluorescence/luminescence circadian imaging system

consisted of an inverted epifluorescence microscope and deep cooled intensified CCD camera housed in a light-tight wooden dark box with a temperature controlled area (dotted rectangle) (A).

Dissected tissues, in this case whole adult *Drosophila* brains, were mounted for imaging on a filter insert in a sterile glass-bottom tissue culture dish containing insect tissue culture media with luciferin (B).

Sterile vacuum grease was applied between the filter insert and cover glass to immobilize the tissue samples and between the lid and the bottom of the dish to provide a seal.
